# Supplementary material for: Synthesis of Cu Nanoparticles Incorporated Mesoporous C/SiO2 for Efficient Tetracycline Degradation
Source: MDPI journal article supplement (doi:10.3390/nano13172478), 2023-09-02
Supplement: s1 [file s1]

# **Synthesis of Cu Nanoparticles Incorporated Mesoporous C/SiO<sub>2</sub> for Efficient Tetracycline Degradation**

*Ning Wang<sup>1,2</sup> Yuanyuan Zhao,<sup>1,2</sup> Xuelian Wu,<sup>1,2</sup> Dapeng Li,<sup>3</sup> Ruguang Ma,<sup>1</sup> Zhigang Chen,<sup>1,3</sup> and Zhengying Wu,<sup>\*1,3</sup>*

*<sup>1</sup> Jiangsu Key Laboratory for Environment Functional Materials, School of Materials Science and Engineering, Suzhou University of Science and Technology, Suzhou 215009, China*

*<sup>2</sup> School of Chemistry and Life Science, Suzhou University of Science and Technology, Suzhou 215009, China*

*<sup>3</sup> Jiangsu Collaborative Innovation Center of Technology and Material for Water Treatment, Suzhou University of Science and Technology, Suzhou 215009, China*

*\*Corresponding authors:*

*Zhengying Wu, Tel./fax: +86 512-67374120, Email: [zywu@mail.usts.edu.cn](mailto:zywu@mail.usts.edu.cn);*

|                                                                                                                                                                                                                                                                                                                    |           |
|--------------------------------------------------------------------------------------------------------------------------------------------------------------------------------------------------------------------------------------------------------------------------------------------------------------------|-----------|
| <b>Supporting information Texts.....</b>                                                                                                                                                                                                                                                                           | <b>S4</b> |
| <b>Text S1.</b> Characterization of the catalysts .....                                                                                                                                                                                                                                                            | 4         |
| <b>Text S2.</b> Analytical methods for adsorption and catalysis.....                                                                                                                                                                                                                                               | 5         |
| <b>Supporting information Table.....</b>                                                                                                                                                                                                                                                                           | <b>S6</b> |
| <b>Table S1.</b> N <sub>2</sub> adsorption/desorption results of the C-SiO <sub>2</sub> and Cu/C-SiO <sub>2</sub> . ....                                                                                                                                                                                           | 6         |
| <b>Table S2.</b> Reaction rate constants of TC degradation by CuO, Cu, C-SiO <sub>2</sub> , and<br>Cu/C-SiO <sub>2</sub> .. ....                                                                                                                                                                                   | 7         |
| <b>Table S3.</b> The catalytic capacity of different catalysts towards TC. ....                                                                                                                                                                                                                                    | 8         |
| <b>Supporting information Figures.....</b>                                                                                                                                                                                                                                                                         | <b>S9</b> |
| <b>Figure S1.</b> TG and DSC curves of the template-containing mesoporous SiO <sub>2</sub><br>sample. ....                                                                                                                                                                                                         | 9         |
| <b>Figure S2.</b> FTIR spectra of C-SiO <sub>2</sub> , Cu/C-SiO <sub>2</sub> -AS, and Cu/C-SiO <sub>2</sub> . ....                                                                                                                                                                                                 | 10        |
| <b>Figure S3.</b> Effect of initial TC concentration on the removal of TC (catalyst dosage<br>= 1 g·L <sup>-1</sup> , C <sub>0</sub> = 350–600 mg·L <sup>-1</sup> , H <sub>2</sub> O <sub>2</sub> = 15 mL, T = 20±2 °C): (a) adsorption and<br>total removal efficiencies, (b) fitted rate constant <i>k</i> ..... | 11        |
| <b>Figure S4.</b> Effect of catalyst dosage on the removal of TC: (a) adsorption and total<br>removal efficiencies, (b) fitted rate constant <i>k</i> (C <sub>0</sub> = 500 mg·L <sup>-1</sup> , H <sub>2</sub> O <sub>2</sub> = 15 mL).<br>.....                                                                  | 12        |
| <b>Figure S5.</b> Effect of H <sub>2</sub> O <sub>2</sub> dosage on the removal of TC: (a) adsorption and total<br>removal efficiencies, (b) fitted rate constant <i>k</i> (catalyst dosage = 1 g·L <sup>-1</sup> , C <sub>0</sub> = 500<br>mg·L <sup>-1</sup> ).....                                              | 13        |
| <b>Figure S6.</b> Effect of pH on the removal of TC: (a) adsorption and total removal                                                                                                                                                                                                                              |           |

efficiencies, (b) fitted rate constant  $k$ , (c) Zeta potentials of Cu/C-SiO<sub>2</sub> at different pH values and (d) the molecular formula for TC..... 14

**Figure S7.** Effect of HA on the removal of TC: (a) adsorption and total removal efficiencies, (b) fitted rate constant  $k$  (catalyst dosage = 1 g·L<sup>-1</sup>,  $C_0$  = 500 mg·L<sup>-1</sup>, pH = 3.65 ± 0.05, H<sub>2</sub>O<sub>2</sub> = 15 mL)..... 15

**Figure S8.** Different quenching scavengers in the Cu/C-SiO<sub>2</sub> + TC system: (a) adsorption and total removal efficiencies, (b) fitted rate constant  $k$  (catalyst dosage = 1 g·L<sup>-1</sup>,  $C_0$  = 500 mg·L<sup>-1</sup>, pH = 3.65 ± 0.05, H<sub>2</sub>O<sub>2</sub> = 15 mL). ..... 16

**Figure S9.** Different concentrations of IPA in the Cu/C-SiO<sub>2</sub> + TC system: (a) adsorption and total removal efficiencies, (b) fitted rate constant  $k$  (catalyst dosage = 1 g·L<sup>-1</sup>,  $C_0$  = 500 mg·L<sup>-1</sup>, pH = 3.65 ± 0.05, H<sub>2</sub>O<sub>2</sub> = 15 mL). ..... 17

**Figure S10.** Cyclic performance of Cu/C-SiO<sub>2</sub> + TC system: (a) adsorption and total removal efficiencies, (b) fitted rate constant  $k$  (catalyst dosage = 1 g·L<sup>-1</sup>,  $C_0$  = 500 mg·L<sup>-1</sup>, pH = 3.65 ± 0.05, H<sub>2</sub>O<sub>2</sub> = 15 mL). ..... 18

## Supporting information Texts

### Text S1. Characterization of the catalysts

The synthesized Cu/C-SiO<sub>2</sub> was characterized by transmission electron microscopy (TEM, JEOL 2100F) with an energy-dispersive X-ray spectrometer (EDS, Bruker XFlash 6T|60) elemental mapping. The mesoporous structure and phase components of the material were determined using an X-ray diffractometer (XRD, Bruker D8 Advance, Cu K $\alpha$  radiation, Germany). The N<sub>2</sub> adsorption-desorption isotherms were measured by a Micromeritics TriStar II 3020 system. The specific surface area and the pore size distribution of the material were calculated by the (BET) and Barrett-Joyner-Halenda (BJH) methods. Thermogravimetric (TG) analysis was conducted using a Perkin-Elmer instrument (SDT Q-600) with a heating rate of 20 °C min<sup>-1</sup> up to 800 °C under airflow. Surface groups and chemical states of the elements for the materials were examined by Fourier transform infrared (FTIR) spectra (Thermo Nicolet IS 10), and X-ray photoelectron spectroscopy (XPS, Thermo Fisher Scientific ESCALAB 250) measurements. Zeta potentials of the Cu/C-SiO<sub>2</sub> at different initial pH values were measured by Zeta-sizer Nano-ZS (Malvern ZEN3690). The TC concentration was determined by using a TU-1901 spectrophotometer at a maximum wavelength of around 357 nm.

**Text S2.** Analytical methods for adsorption and catalysis

The samples were taken by disposable syringe at different times and then filtrate was immediately collected through 0.45  $\mu\text{m}$  filter membrane to measure the absorbance.

The catalytic degradation curve was fitted by the first-order model (Eq. (1)):

$$-\ln(C_0/C_t) = kt \quad (1)$$

Among them,  $C_0$  and  $C_t$  are the initial concentration of TC and the concentration at time  $t$ ,  $\text{mg}\cdot\text{L}^{-1}$ ;  $k$  is the reaction rate coefficient,  $\text{min}^{-1}$ ;  $t$  is the reaction time, h.

## Supporting information Table

**Table S1.** N<sub>2</sub> adsorption/desorption results of the C-SiO<sub>2</sub> and Cu/C-SiO<sub>2</sub>.

| Sample                      | $S_{\text{BET}}$                   | $V_{\text{P}}$                      | $D_{\text{BJH}}$ |
|-----------------------------|------------------------------------|-------------------------------------|------------------|
|                             | (m <sup>2</sup> ·g <sup>-1</sup> ) | (cm <sup>3</sup> ·g <sup>-1</sup> ) | (nm)             |
| C/SiO <sub>2</sub>          | 756                                | 1.01                                | 10.78            |
| Cu-C/SiO <sub>2</sub> (0.2) | 509                                | 0.65                                | 9.94             |

$D_{\text{BJH}}$ : pore diameters were calculated from the adsorption branches.

**Table S2.** Reaction rate constants of TC degradation by CuO, Cu, C-SiO<sub>2</sub>, and Cu/C-SiO<sub>2</sub>.

| Sample                | reaction rate constant ( $k$ , min <sup>-1</sup> ) |
|-----------------------|----------------------------------------------------|
| Cu-C/SiO <sub>2</sub> | 0.05576                                            |
| Cu                    | 0.00957                                            |
| CuO                   | 0.00383                                            |
| C/SiO <sub>2</sub>    | 0.00296                                            |

**Table S3.** The catalytic capacity of different catalyst towards TC.

| catalyst                                       | time<br>(h) | $C_0$<br>(mg·L <sup>-1</sup> ) | dose<br>(g·L <sup>-1</sup> ) | $C/C_0$<br>(%) | Reference |
|------------------------------------------------|-------------|--------------------------------|------------------------------|----------------|-----------|
| CuFeO <sub>2</sub> /BC                         | 300         | 20                             | 0.6                          | 89.1           | [1]       |
| CuFeO <sub>2</sub> -NO/PBC                     | 180         | 20                             | 0.8                          | 96.1           | [2]       |
| Cu/CuFe <sub>2</sub> O <sub>4</sub>            | 1120        | 50                             | 0.3                          | 75.4           | [3]       |
| SAS-Cu                                         | 30          | 20                             | 0.1                          | 82.5           | [4]       |
| Fe <sub>0.25</sub> Cu <sub>0.75</sub> (BDC)@DE | 120         | 20                             | 0.5                          | 93.0           | [5]       |
| Cu/C-SiO <sub>2</sub>                          | 240         | 500                            | 1.0                          | 99.9           | This work |



## Supporting information Figures

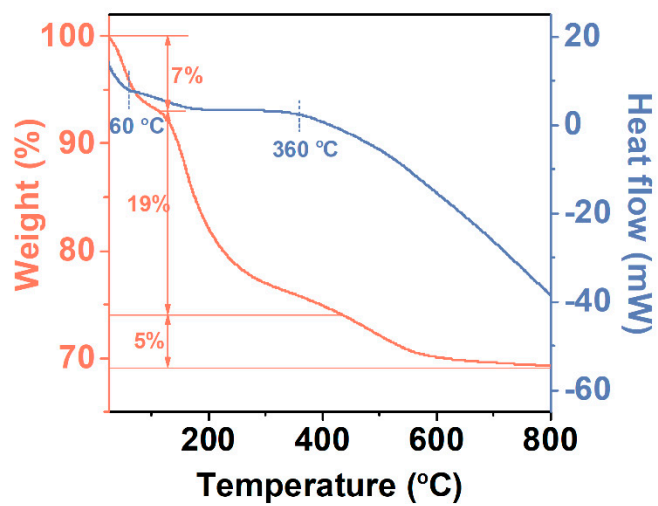

**Figure S1.** TG and DSC curves of the template-containing mesoporous SiO<sub>2</sub> sample.

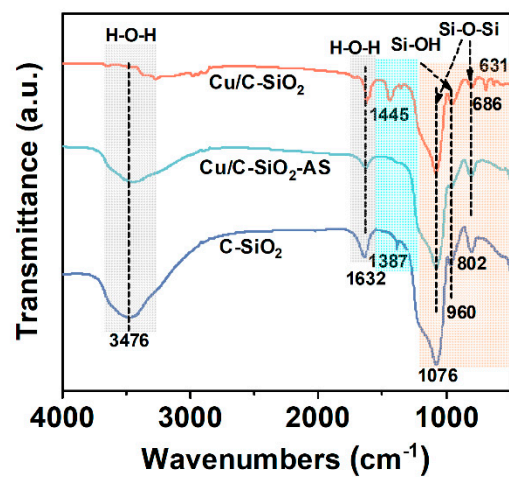

**Figure S2.** FTIR spectra of  $\text{C-SiO}_2$ ,  $\text{Cu/C-SiO}_2\text{-AS}$ , and  $\text{Cu/C-SiO}_2$ .

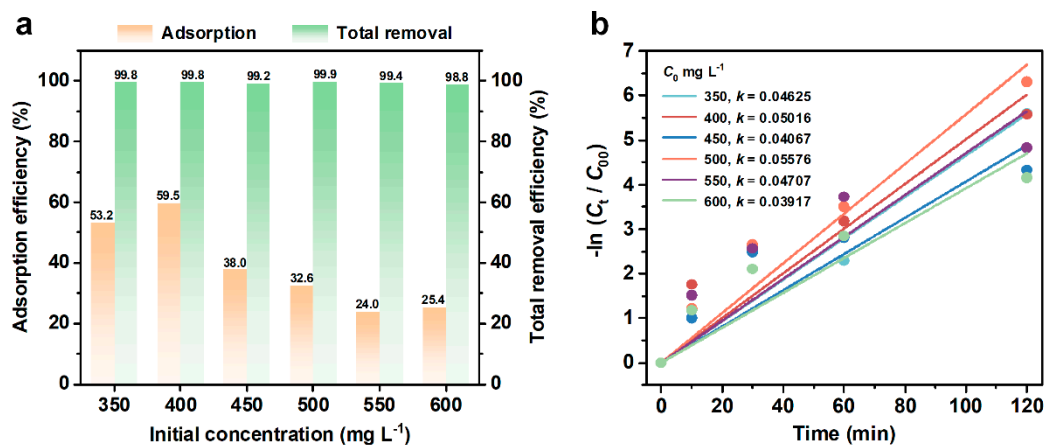

**Figure S3.** Effect of initial TC concentration on the removal of TC (catalyst dosage =  $1 \text{ g} \cdot \text{L}^{-1}$ ,  $C_0 = 350\text{--}600 \text{ mg} \cdot \text{L}^{-1}$ ,  $\text{H}_2\text{O}_2 = 15 \text{ mL}$ ,  $T = 20 \pm 2 \text{ }^\circ\text{C}$ ): (a) adsorption and total removal efficiencies, (b) fitted rate constant  $k$ .

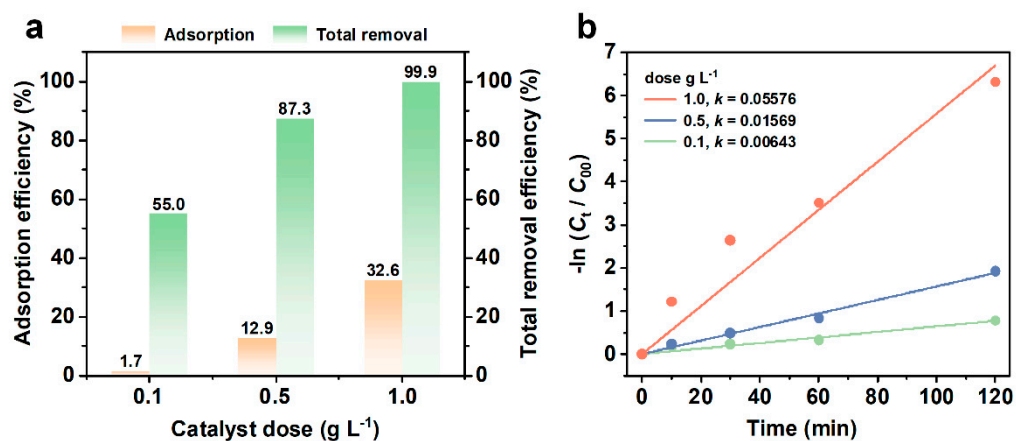

**Figure S4.** Effect of catalyst dosage on the removal of TC: (a) adsorption and total removal efficiencies, (b) fitted rate constant  $k$  ( $C_0 = 500 \text{ mg} \cdot \text{L}^{-1}$ ,  $\text{H}_2\text{O}_2 = 15 \text{ mL}$ ).

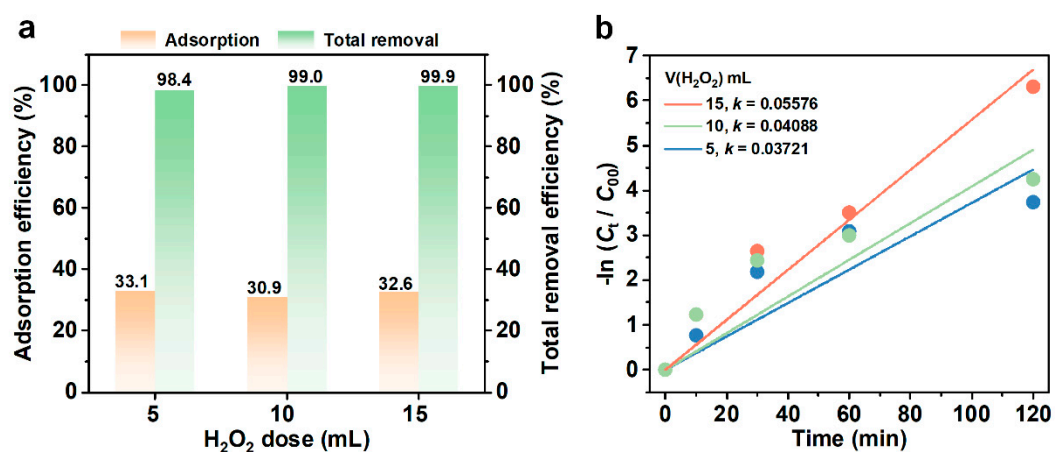

**Figure S5.** Effect of H<sub>2</sub>O<sub>2</sub> dosage on the removal of TC: (a) adsorption and total removal efficiencies, (b) fitted rate constant  $k$  (catalyst dosage = 1 g·L<sup>-1</sup>,  $C_0 = 500$  mg·L<sup>-1</sup>)

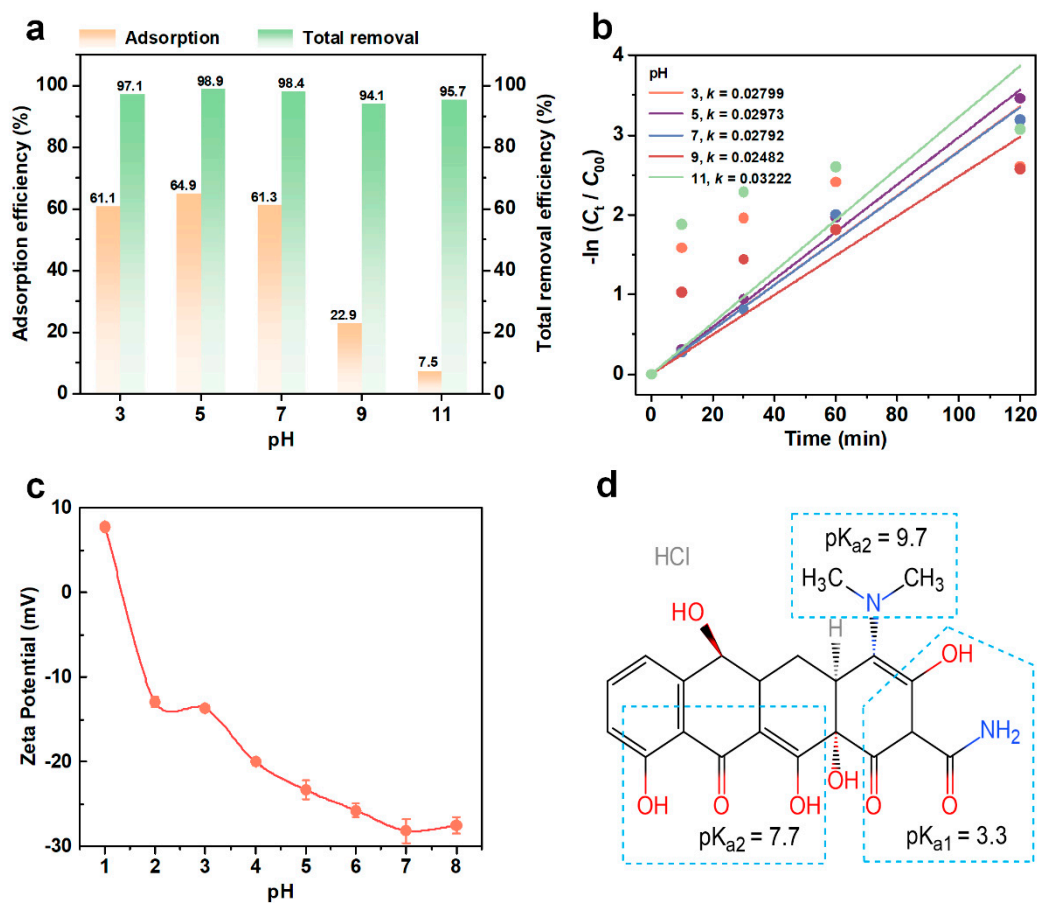

**Figure S6.** Effect of pH on the removal of TC: (a) adsorption and total removal efficiencies, (b) fitted rate constant  $k$ , (c) Zeta potentials of Cu/C-SiO<sub>2</sub> at different pH values and (d) the molecular formula for TC.

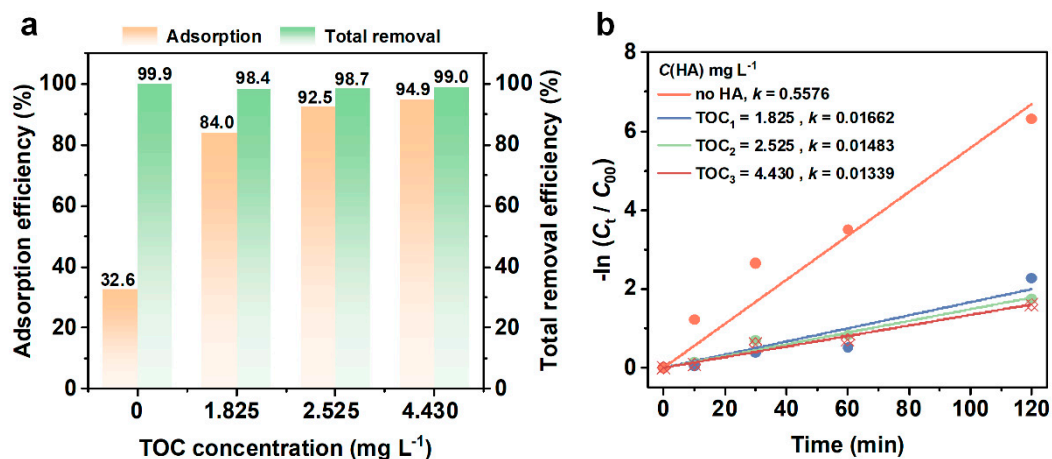

**Figure S7.** Effect of HA on the removal of TC: (a) adsorption and total removal efficiencies, (b) fitted rate constant  $k$  (catalyst dosage = 1 g·L<sup>-1</sup>,  $C_0$  = 500 mg·L<sup>-1</sup>, pH = 3.65 ± 0.05, H<sub>2</sub>O<sub>2</sub> = 15 mL).

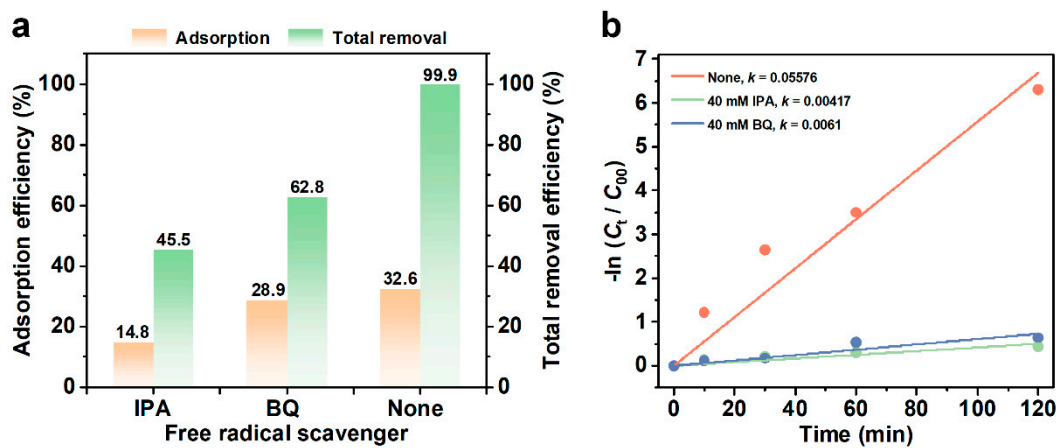

**Figure S8.** Different quenching scavengers in the Cu/C-SiO<sub>2</sub> + TC system: (a) adsorption and total removal efficiencies, (b) fitted rate constant  $k$  (catalyst dosage = 1 g·L<sup>-1</sup>,  $C_0 = 500$  mg·L<sup>-1</sup>, pH = 3.65 ± 0.05, H<sub>2</sub>O<sub>2</sub> = 15 mL).



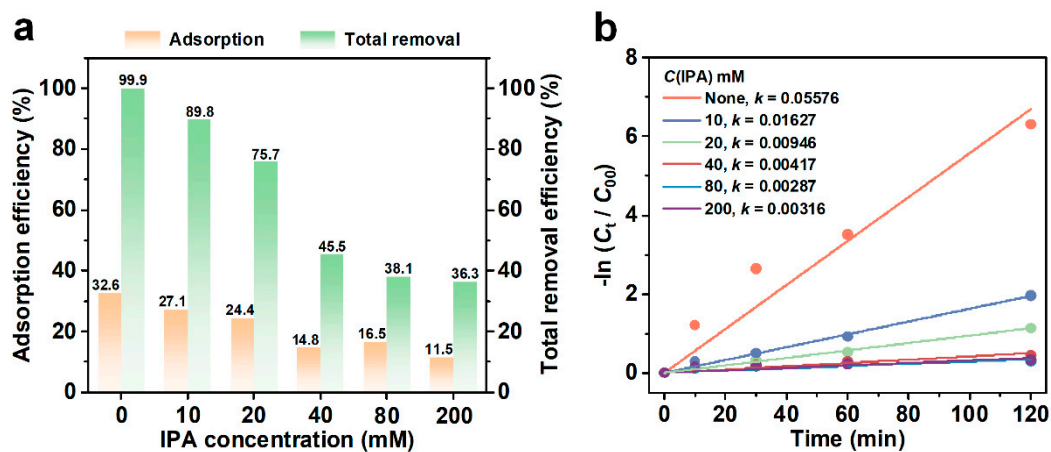

**Figure S9.** Different concentrations of IPA in the Cu/C-SiO<sub>2</sub> + TC system: (a) adsorption and total removal efficiencies, (b) fitted rate constant  $k$  (catalyst dosage = 1 g·L<sup>-1</sup>, C<sub>0</sub> = 500 mg·L<sup>-1</sup>, pH = 3.65 ± 0.05, H<sub>2</sub>O<sub>2</sub> = 15 mL).

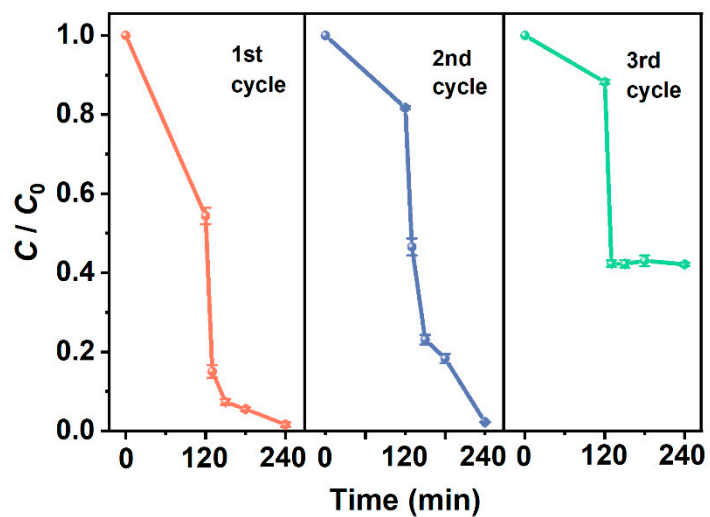

**Figure S10.** Cycling performance of Cu/C-SiO<sub>2</sub> (Adsorption for 2 hours, and catalytic reaction for 2 hours. Catalyst dosage = 1 g·L<sup>-1</sup>,  $C_0 = 500 \text{ mg} \cdot \text{L}^{-1}$ , pH =  $3.65 \pm 0.05$ , H<sub>2</sub>O<sub>2</sub> = 15 mL).

## Reference

1. Xin, S.; Liu, G.; Ma, X.; Gong, J.; Ma, B.; Yan, Q.; Chen, Q.; Ma, D.; Zhang, G.; Gao, M.; et al. High efficiency heterogeneous Fenton-like catalyst biochar modified CuFeO<sub>2</sub> for the degradation of tetracycline: Economical synthesis, catalytic performance and mechanism. *Applied Catalysis B: Environmental* 2021, 280, 119386, doi:10.1016/j.apcatb.2020.119386.
2. Xin, S.; Huo, S.; Xin, Y.; Gao, M.; Wang, Y.; Liu, W.; Zhang, C.; Ma, X. Heterogeneous photo-electro-Fenton degradation of tetracycline through nitrogen/oxygen self-doped porous biochar supported CuFeO<sub>2</sub> multifunctional cathode catalyst under visible light. *Applied Catalysis B: Environmental* 2022, 312, 121442, doi:10.1016/j.apcatb.2022.121442.
3. Li, Z.; Guo, C.; Lyu, J.; Hu, Z.; Ge, M. Tetracycline degradation by persulfate activated with magnetic Cu/CuFe<sub>2</sub>O<sub>4</sub> composite: efficiency, stability, mechanism and degradation pathway. *Journal of Hazardous Materials* 2019, 373, 85-96, doi:10.1016/j.jhazmat.2019.03.075.
4. Liu, J.; He, H.; Shen, Z.; Wang, H.H.; Li, W. Photoassisted highly efficient activation of persulfate over a single-atom Cu catalyst for tetracycline degradation: Process and mechanism. *Journal of Hazardous Materials* 2022, 429, 128398, doi:10.1016/j.jhazmat.2022.128398.

5. Cui, K.P.; He, Y.Y.; Xu, K.J.; Zhang, Y.; Chen, C.B.; Xu, Z.J.; Chen, X.  
Degradation of tetracycline hydrochloride by Cu-doped MIL-101(Fe) loaded  
diatomite heterogeneous Fenton catalyst. *Nanomaterials* 2022, 12, 811,  
doi:10.3390/nano12050811.
